# Supplementary material
Source: publisher figshare collection journal article supplement (https://frontiersin.figshare.com/ndownloader/files/31313749)
Supplement: Supplementary file [file 31313749]

## Supplementary Material

**Supplementary Table 1. The crude drug materials in Jinmaitong (JMT).**

| Voucher number | Drug name               | Biological origin                                         | Chinese name | Ratio (w/w) |
|----------------|-------------------------|-----------------------------------------------------------|--------------|-------------|
| JMT-17A        | Semen Cuscutae          | the seeds of <i>Cuscuta chinensis</i> Lam.                | Tu-Si-Zi     | 10          |
| JMT-17B        | Fructus Ligustri Lucidi | the seeds of <i>Ligustrum lucidum</i> Ait.                | Nv-Zhen-Zi   | 10          |
| JMT-17C        | Herba Ecliptae          | the herb of <i>Eclipta prostrata</i> L.                   | Mo-Han-Lian  | 10          |
| JMT-17D        | Herba Prunella vulgaris | the herb of <i>Prunella vulgaris</i> L.                   | Xia-Ku-Cao   | 10          |
| JMT-17E        | Semen Litchi            | the seeds of <i>Litchi chinensis</i> Sonn.                | Li-Zhi-He    | 30          |
| JMT-17F        | Scorpio                 | the whole body of <i>Buthus martensii</i> K.              | Quan-Xie     | 3           |
| JMT-17G        | Ramulus Cinnamomi       | the tender stem of <i>Cinnamomum cassia</i> Presl.        | Gui-Zhi      | 10          |
| JMT-17H        | Rhizoma Corydalis       | the rhizoma of <i>Corydalis yanhusuo</i> W. T. Wang       | Yan-Hu-Suo   | 10          |
| JMT-17I        | Semen Persicae          | the seeds of <i>Prunus persica</i> L.                     | Tao-Ren      | 10          |
| JMT-17J        | Semen Cassiae           | the seeds of <i>Cassia obtusifolia</i> L.                 | Jue-Ming-Zi  | 30          |
| JMT-17K        | Radix et Rhizoma Asari  | the radix and rhizoma of <i>Asarum heterotropiodes</i> F. | Xi-Xin       | 3           |
| JMT-17L        | Hirudo                  | <i>Hirudo nipponica</i> W                                 | Shui-Zhi     | 3           |

**Supplementary Table 2. Detailed information of the primary antibodies.**

| Name of antibody | Manufacture (Host) | Working dilution | Applications |
|------------------|--------------------|------------------|--------------|
| NLRP3            | Abcam ((Rabbit)    | 1:200            | IHC          |
| IL-1 $\beta$     | R&D (Goat)         | 1:150            | IHC          |
| NLRP3            | Abcam (Rabbit)     | 1:1000           | WB           |
| Caspase-1        | Abcam (Rabbit)     | 1:1000           | WB           |
| IL-1 $\beta$     | Santa Cruz (Mouse) | 1:1000           | WB           |
| GSDMD            | Santa Cruz (Mouse) | 1:500            | WB           |
| $\beta$ -actin   | Santa Cruz (Mouse) | 1:1000           | WB           |

*Note:* IHC, immunohistochemistry; WB, western blot.

**Supplementary Table 3. Primer sequences for qRT-PCR.**

| Gene           |         | Primer sequence                |
|----------------|---------|--------------------------------|
| NLRP3          | Forward | 5'-CCAGAGCCTCACTGAACTGG-3'     |
|                | Reverse | 5'-AGCATTGATGGGTCAGTCCG-3'     |
| ASC            | Forward | 5'-GGACAGTACCAGGCAGTTCG-3'     |
|                | Reverse | 5'-GTCACCAAGTAGGGCTGTGT-3'     |
| Caspase-1      | Forward | 5'-CTGGACTGCGGTATTGAGAC-3'     |
|                | Reverse | 5'-CCGGGTGCGGTAGAGTAAGC-3'     |
| IL-1 $\beta$   | Forward | 5'-CGTGCGTGACATTAAAGAG-3'      |
|                | Reverse | 5'-TTGCCGATAGTGATGACC-3'       |
| GSDMD          | Forward | 5'-TGAATGTGTACTCGCTGAGTGTGG-3' |
|                | Reverse | 5'-CAGCTGCTGCAGGACTTTGTG-3'    |
| $\beta$ -actin | Forward | 5'-CCCATCTATGAGGGTTACGC-3'     |
|                | Reverse | 5'-TTTAATGTCACGCACGATTTC-3'    |

**Supplementary Table 4. The ingredients separation and identification of JMT by UPLC/MS analysis**

| No. | t <sub>R</sub> (min) | Name                      | Formula                                                      | Class                               | [MH] <sup>-</sup> (m/z) | Peak Area |
|-----|----------------------|---------------------------|--------------------------------------------------------------|-------------------------------------|-------------------------|-----------|
| 1   | 0.60                 | L(+)-Arginine             | C <sub>6</sub> H <sub>14</sub> N <sub>4</sub> O <sub>2</sub> | Amino acid derivatives              | 173.1048                | 2.28E+07  |
| 2   | 0.62                 | MANNITOL                  | C <sub>6</sub> H <sub>14</sub> O <sub>6</sub>                | Organooxygen compounds              | 181.0723                | 1.65E+08  |
| 3   | 0.67                 | D-Gluconic acid           | C <sub>6</sub> H <sub>12</sub> O <sub>7</sub>                | Organic acids and derivatives       | 195.0514                | 1.45E+09  |
| 4   | 0.67                 | Inositol                  | C <sub>6</sub> H <sub>12</sub> O <sub>6</sub>                | Organic oxygen compounds            | 179.0564                | 4.66E+08  |
| 5   | 0.67                 | Xylose                    | C <sub>5</sub> H <sub>10</sub> O <sub>5</sub>                | Carbohydrates and derivatives       | 149.0458                | 7.72E+07  |
| 6   | 0.67                 | Citric acid               | C <sub>6</sub> H <sub>8</sub> O <sub>7</sub>                 | Carboxylic acids and derivatives    | 191.0203                | 2.96E+09  |
| 7   | 0.69                 | Fumaric acid              | C <sub>4</sub> H <sub>4</sub> O <sub>4</sub>                 | Organic acids and derivatives       | 115.0040                | 1.58E+08  |
| 8   | 0.72                 | Sucrose                   | C <sub>12</sub> H <sub>22</sub> O <sub>11</sub>              | Carbohydrates and derivatives       | 341.1101                | 2.27E+08  |
| 9   | 0.75                 | D-(+)-Malic acid          | C <sub>4</sub> H <sub>6</sub> O <sub>5</sub>                 | Hydroxy acids and derivatives       | 133.0146                | 1.59E+09  |
| 10  | 0.88                 | Uridine                   | C <sub>9</sub> H <sub>12</sub> N <sub>2</sub> O <sub>6</sub> | Alkaloids                           | 243.0625                | 2.23E+07  |
| 11  | 0.88                 | 5-OXO-D-PROLINE           | C <sub>5</sub> H <sub>7</sub> N <sub>3</sub> O <sub>3</sub>  | Amino acid derivatives              | 128.0356                | 1.30E+08  |
| 12  | 0.88                 | Aconitic Acid             | C <sub>6</sub> H <sub>6</sub> O <sub>6</sub>                 | Organic acids and derivatives       | 173.0096                | 1.61E+08  |
| 13  | 0.89                 | N-Acetyl-DL-glutamic acid | C <sub>7</sub> H <sub>11</sub> N <sub>3</sub> O <sub>5</sub> | Amino acid derivatives              | 188.0570                | 5.08E+07  |
| 14  | 0.89                 | Atranol                   | C <sub>8</sub> H <sub>8</sub> O <sub>3</sub>                 | Miscellaneous                       | 151.0403                | 3.43E+07  |
| 15  | 0.89                 | 3,4-Dihydroxyphenylglycol | C <sub>8</sub> H <sub>10</sub> O <sub>4</sub>                | Phenols                             | 169.0510                | 1.38E+07  |
| 16  | 0.93                 | Citraconic acid           | C <sub>5</sub> H <sub>6</sub> O <sub>4</sub>                 | Fatty Acyls                         | 129.0197                | 9.12E+07  |
| 17  | 0.93                 | SUCCINATE                 | C <sub>4</sub> H <sub>6</sub> O <sub>4</sub>                 | Organic acids and derivatives       | 117.0197                | 6.62E+08  |
| 18  | 1.02                 | L-ISOLEUCINE              | C <sub>6</sub> H <sub>13</sub> N <sub>3</sub> O <sub>2</sub> | Amino acid derivatives              | 130.0878                | 1.63E+08  |
| 19  | 1.05                 | Gallic acid               | C <sub>7</sub> H <sub>6</sub> O <sub>5</sub>                 | Phenols                             | 169.0148                | 1.66E+08  |
| 20  | 1.07                 | Sorbose                   | C <sub>6</sub> H <sub>12</sub> O <sub>6</sub>                | Benzene and substituted derivatives | 179.0565                | 9.28E+07  |
| 21  | 1.07                 | adipic acid               | C <sub>6</sub> H <sub>10</sub> O <sub>4</sub>                | Fatty acids                         | 145.0512                | 2.04E+07  |
| 22  | 1.21                 | 2-METHYLMALEATE           | C <sub>5</sub> H <sub>6</sub> O <sub>4</sub>                 | Fatty Acyls                         | 129.0198                | 4.13E+07  |
| 23  | 1.35                 | Pyrogallol                | C <sub>6</sub> H <sub>6</sub> O <sub>3</sub>                 | Phenols                             | 125.0248                | 1.45E+07  |

|    |      |                                    |                    |                                  |          |          |
|----|------|------------------------------------|--------------------|----------------------------------|----------|----------|
| 24 | 1.41 | kojic acid                         | C6H6O4             | Organoheterocyclic compounds     | 141.0198 | 1.78E+07 |
| 25 | 1.46 | 2,3-DIHYDROXYBENZOATE              | C7H6O4             | Phenylpropanoids and polyketides | 153.0197 | 3.38E+07 |
| 26 | 1.50 | Phenylalanine                      | C9H11NO2           | Amino acid derivatives           | 164.0722 | 1.07E+08 |
| 27 | 1.51 | 4-Methoxysalicylic acid            | C8H8O4             | Phenols                          | 167.0355 | 1.24E+08 |
| 28 | 1.54 | Caffeic acid                       | C9H8O4             | Phenylpropanoids                 | 179.0354 | 1.85E+07 |
| 29 | 1.64 | Glutaric acid                      | C5H8O4             | Organic acids and derivatives    | 131.0354 | 5.42E+07 |
| 30 | 1.65 | Calcium pantothenate               | C9H17NO5.1/2<br>Ca | Alkaloids                        | 218.1040 | 8.31E+07 |
| 31 | 1.74 | Coumarin + 1O + 1MeO, O-Hex-Hex    | C22H28O14          | Phenylpropanoids                 | 515.1424 | 6.13E+08 |
| 32 | 1.79 | Catechol                           | C6H6O2             | Phenols                          | 109.0297 | 1.21E+08 |
| 33 | 1.84 | 4-Methoxyphenylacetic acid         | C9H10O3            | Phenolic acids                   | 165.0561 | 2.85E+07 |
| 34 | 1.90 | 3,4-Dihydroxyphenylethanol         | C8H10O3            | Phenols                          | 153.0562 | 6.58E+08 |
| 35 | 1.90 | 4-Methylcatechol                   | C7H8O2             | Phenols                          | 123.0454 | 1.60E+08 |
| 36 | 1.90 | Methyl-4-hydroxy-3-methoxybenzoate | C9H10O4            | Benzoic acids and derivatives    | 181.0510 | 3.36E+07 |
| 37 | 1.99 | Harpagide                          | C15H24O10          | Iridoids                         | 363.1307 | 1.79E+07 |
| 38 | 2.01 | Orsellinic acid                    | C8H8O4             | Phenols                          | 167.0355 | 1.68E+07 |
| 39 | 2.07 | Orcinol gentiobioside              | C19H28O12          | Phenols                          | 447.1517 | 1.11E+07 |
| 40 | 2.11 | Lamiide                            | C17H26O12          | Iridoids                         | 421.1364 | 3.48E+07 |
| 41 | 2.16 | P-Anisic acid                      | C8H8O3             | Phenols                          | 151.0402 | 2.79E+07 |
| 42 | 2.19 | Shanzhiside                        | C16H24O11          | Iridoids                         | 391.1250 | 1.97E+07 |
| 43 | 2.23 | 4-Hydroxyphenyllactic acid         | C9H10O4            | Phenylpropanoids                 | 181.0509 | 1.34E+08 |
| 44 | 2.26 | Loganic acid                       | C16H24O10          | Iridoids                         | 375.1308 | 9.04E+07 |
| 45 | 2.30 | Swertiamarin                       | C16H22O10          | Iridoids                         | 419.1210 | 3.17E+08 |
| 46 | 2.30 | Piperonylic Acid                   | C8H6O4             | Organic acids and derivatives    | 165.0195 | 6.60E+07 |
| 47 | 2.31 | Carpachromene                      | C20H16O5           | Flavonoids                       | 335.0909 | 5.63E+08 |
| 48 | 2.38 | L-Tryptophan                       | C11H12N2O2         | Organoheterocyclic compounds     | 203.0829 | 3.71E+07 |

|    |      |                                                                                                                                           |            |                                     |          |          |
|----|------|-------------------------------------------------------------------------------------------------------------------------------------------|------------|-------------------------------------|----------|----------|
| 49 | 2.42 | [(2R,3S,4S,5R,6R)-6-[(2S,3S,4S,5R)-3,4-dihydroxy-2,5-bis(hydroxymethyl)oxolan-2-yl]oxy-3,4,5-trihydroxyoxan-2-yl]methyl 4-hydroxybenzoate | C19H26O13  | Phenylpropanoids and polyketides    | 461.1305 | 2.23E+07 |
| 50 | 2.43 | Ajugol                                                                                                                                    | C15H24O9   | Terpenoids                          | 393.1409 | 6.35E+07 |
| 51 | 2.45 | Protocatechualdehyde                                                                                                                      | C7H6O3     | Phenols                             | 137.0246 | 5.38E+08 |
| 52 | 2.51 | Fraxetin                                                                                                                                  | C10H8O5    | Coumarins and derivatives           | 207.0299 | 2.58E+07 |
| 53 | 2.59 | p-Hydroxy-cinnamic acid                                                                                                                   | C9H8O3     | Phenylpropanoids                    | 163.0400 | 1.02E+08 |
| 54 | 2.59 | (1R,3R,4S,5R)-1,3,4-trihydroxy-5-[(E)-3-(4-hydroxyphenyl)prop-2-enoyl]oxycyclohexane-1-carboxylic acid                                    | C16H18O8   | Phenylpropanoids                    | 337.0937 | 2.28E+09 |
| 55 | 2.61 | Forsythoside E                                                                                                                            | C20H30O12  | Phenylpropanoids                    | 461.1676 | 1.12E+07 |
| 56 | 2.76 | Chlorogenic acid                                                                                                                          | C16H18O9   | Phenylpropanoids                    | 353.0883 | 8.88E+08 |
| 57 | 2.76 | Quinic acid                                                                                                                               | C7H12O6    | Organooxygen compounds              | 191.0565 | 2.04E+08 |
| 58 | 2.90 | Benzyl alcohol + Hex-Hex                                                                                                                  | C19H28O11  | Organooxygen compounds              | 477.1627 | 1.10E+09 |
| 59 | 2.90 | osmanthuside H                                                                                                                            | C19H28O11  | Flavonoids                          | 431.1570 | 1.84E+08 |
| 60 | 2.94 | 4-Hydroxyphenylacetic acid                                                                                                                | C8H8O3     | Phenols                             | 151.0402 | 2.77E+07 |
| 61 | 2.96 | Glutamylphenylalanine                                                                                                                     | C14H18N2O5 | Carboxylic acids and derivatives    | 293.1242 | 2.05E+08 |
| 62 | 3.04 | Cryptochlorogenic acid                                                                                                                    | C16H18O9   | Phenylpropanoids                    | 353.0883 | 3.21E+08 |
| 63 | 3.05 | methyl chlorogenate                                                                                                                       | C17H20O9   | Phenylpropanoids                    | 367.1037 | 5.18E+06 |
| 64 | 3.07 | Coumaroyl Hexoside                                                                                                                        | C15H18O8   | Phenylpropanoids                    | 325.0935 | 8.97E+07 |
| 65 | 3.08 | 6,7-Dihydroxycoumarin                                                                                                                     | C9H6O4     | Phenylpropanoids                    | 177.0199 | 3.57E+08 |
| 66 | 3.13 | 2',4'-DIHYDROXYACETOPHENONE                                                                                                               | C8H8O3     | Benzene and substituted derivatives | 151.0403 | 6.60E+07 |
| 67 | 3.29 | Amygdalin                                                                                                                                 | C20H27NO11 | Phenols                             | 502.1568 | 1.71E+10 |
| 68 | 3.41 | geniposide                                                                                                                                | C17H24O10  | Iridoids                            | 387.1301 | 2.82E+07 |
| 69 | 3.44 | Gentisic acid                                                                                                                             | C7H6O4     | Xanthones                           | 153.0197 | 5.02E+07 |
| 70 | 3.47 | 4-hydroxybenzaldehyde                                                                                                                     | C7H6O2     | Phenols                             | 121.0299 | 2.06E+08 |
| 71 | 3.56 | Syringic Acid                                                                                                                             | C9H10O5    | Phenols                             | 197.0461 | 1.23E+07 |

|    |      |                                                                                                                                                                       |           |                               |          |          |
|----|------|-----------------------------------------------------------------------------------------------------------------------------------------------------------------------|-----------|-------------------------------|----------|----------|
| 72 | 3.70 | 7,8-Dihydroxycoumarin                                                                                                                                                 | C9H6O4    | Phenylpropanoids              | 177.0197 | 2.27E+07 |
| 73 | 3.72 | Secoxyloganin                                                                                                                                                         | C17H24O11 | Iridoids                      | 403.1258 | 1.89E+08 |
| 74 | 3.79 | sweroside                                                                                                                                                             | C16H22O9  | Terpenoids                    | 357.1196 | 2.46E+07 |
| 75 | 3.79 | Shikimic acid                                                                                                                                                         | C7H10O5   | Phenolic acids                | 173.0458 | 2.18E+08 |
| 76 | 3.83 | 5,7-dihydroxy-2-(4-hydroxyphenyl)-6,8-bis[3,4,5-trihydroxy-6-(hydroxymethyl)oxan-2-yl]chromen-4-one                                                                   | C27H30O15 | Flavonoids                    | 593.1522 | 5.22E+07 |
| 77 | 3.85 | Benzyl alcohol + Hex-Pen                                                                                                                                              | C18H26O10 | Miscellaneous                 | 401.1458 | 6.69E+07 |
| 78 | 4.03 | Demethylwedelolactone                                                                                                                                                 | C15H8O7   | Phenylpropanoids              | 299.0205 | 1.18E+08 |
| 79 | 4.03 | Delphinidin                                                                                                                                                           | C15H11O7  | Tetraterpenes                 | 301.0362 | 2.93E+08 |
| 80 | 4.07 | Prulaurasin                                                                                                                                                           | C14H17NO6 | Terpenoids                    | 294.0987 | 4.55E+07 |
| 81 | 4.29 | methyl (1S)-7-hydroxy-7-methyl-1-[(2S,3R,4S,5S,6R)-3,4,5-trihydroxy-6-(hydroxymethyl)oxan-2-yl]oxy-4a,5,6,7a-tetrahydro-1H-cyclopenta[c]pyran-4-carboxylate           | C17H26O10 | Terpenoids                    | 389.1462 | 1.28E+07 |
| 82 | 4.41 | Gossypetin-8-C-glucoside                                                                                                                                              | C21H20O13 | Flavonoids                    | 479.0842 | 3.05E+08 |
| 83 | 4.41 | (-)-12-hydroxyjasmonic acid                                                                                                                                           | C12H18O4  | Jasmonic acid                 | 225.1136 | 9.71E+08 |
| 84 | 4.43 | Isoleucine                                                                                                                                                            | C6H13NO2  | Amino acid derivatives        | 130.0875 | 8.14E+06 |
| 85 | 4.47 | Luteolin-4'-O-glucoside                                                                                                                                               | C21H20O11 | Flavonoids                    | 447.0934 | 7.44E+07 |
| 86 | 4.54 | Coumaroyl quinic acid                                                                                                                                                 | C16H18O8  | Phenylpropanoids              | 337.0936 | 3.01E+07 |
| 87 | 4.59 | vanillic acid                                                                                                                                                         | C8H8O4    | Organic acids and derivatives | 167.0355 | 1.36E+07 |
| 88 | 4.62 | Shanzhiside methyl ester                                                                                                                                              | C17H26O11 | Terpenoids                    | 405.1407 | 4.21E+07 |
| 89 | 4.65 | Aloenin                                                                                                                                                               | C19H22O10 | Phenols                       | 409.1178 | 2.61E+07 |
| 90 | 4.74 | 3-Phenyllactic acid                                                                                                                                                   | C9H10O3   | Carbonyl                      | 165.0561 | 1.31E+08 |
| 91 | 4.80 | Methyl gallate                                                                                                                                                        | C8H8O5    | Phenols                       | 183.0301 | 1.21E+08 |
| 92 | 4.86 | methyl (1S,4aR,7aR)-4a-hydroxy-7-(hydroxymethyl)-1-[(2S,3R,4S,5S,6R)-3,4,5-trihydroxy-6-(hydroxymethyl)oxan-2-yl]oxy-5,7a-dihydro-1H-cyclopenta[c]pyran-4-carboxylate | C17H24O11 | Miscellaneous                 | 403.1258 | 5.14E+07 |

|     |      |                                                                                                                                                                                       |            |                                  |          |          |
|-----|------|---------------------------------------------------------------------------------------------------------------------------------------------------------------------------------------|------------|----------------------------------|----------|----------|
| 93  | 4.86 | Suberic acid                                                                                                                                                                          | C8H14O4    | Fatty acids                      | 173.0824 | 3.58E+07 |
| 94  | 4.87 | Isoscopoletin                                                                                                                                                                         | C10H8O4    | Coumarins and derivatives        | 191.0354 | 1.16E+07 |
| 95  | 4.96 | Ferulic acid                                                                                                                                                                          | C10H10O4   | Phenylpropanoids                 | 193.0512 | 1.50E+07 |
| 96  | 4.99 | 1-[[[(2S,3R,11bR)-3-ethyl-9,10-dimethoxy-2,3,4,6,7,11b-hexahydro-1H-benzo[a]quinolizin-2-yl]methyl]-7-methoxy-3,4-dihydro-2H-isoquinolin-6-one                                        | C28H36N2O4 | Alkaloids                        | 463.2555 | 2.58E+08 |
| 97  | 5.13 | (2S,3S)-2-(3,4-dihydroxyphenyl)-3,7-dihydroxy-2,3-dihydrochromen-4-one                                                                                                                | C15H12O6   | Flavonoids                       | 287.0566 | 2.59E+07 |
| 98  | 5.14 | Taxifolin                                                                                                                                                                             | C15H12O7   | Flavonoids                       | 303.0515 | 1.90E+07 |
| 99  | 5.16 | Procyanidin B2                                                                                                                                                                        | C30H26O12  | Procyanidins                     | 577.1365 | 2.10E+07 |
| 100 | 5.17 | Quercetin-3-O-galactoside                                                                                                                                                             | C21H20O12  | Flavonoids                       | 463.0899 | 7.98E+08 |
| 101 | 5.24 | Procyanidin A2                                                                                                                                                                        | C30H24O12  | Procyanidins                     | 575.1199 | 2.97E+08 |
| 102 | 5.25 | 5,7-dihydroxy-2-(4-hydroxyphenyl)-3-[(2S,3R,4S,5S,6R)-3,4,5-trihydroxy-6-[[[(2S,3R,4S,5S)-3,4,5-trihydroxyoxan-2-yl]oxymethyl]oxan-2-yl]oxychromen-4-one                              | C26H28O15  | Flavonoids                       | 579.1369 | 1.98E+07 |
| 103 | 5.34 | (2Z)-2-[4-[2-[2-(3,4-dihydroxyphenyl)ethoxy]-2-oxoethyl]-5-methoxycarbonyl-2-[(2S,3R,4S,5S,6R)-3,4,5-trihydroxy-6-(hydroxymethyl)oxan-2-yl]oxy-4H-pyran-3-ylidene]acetic acid         | C25H30O15  | Phenols                          | 569.1531 | 2.25E+08 |
| 104 | 5.45 | [(2R,3R,4S,5R,6R)-6-[2-(3,4-dihydroxyphenyl)ethoxy]-3,5-dihydroxy-4-[(2R,3R,4R,5R,6S)-3,4,5-trihydroxy-6-methyloxan-2-yl]oxyoxan-2-yl]methyl (E)-3-(3,4-dihydroxyphenyl)prop-2-enoate | C29H36O15  | Phenylpropanoids                 | 623.2002 | 2.44E+08 |
| 105 | 5.45 | 3-(2-HYDROXYPHENYL)PROPANOATE                                                                                                                                                         | C9H10O3    | Phenylpropanoids and polyketides | 165.0561 | 2.78E+07 |
| 106 | 5.58 | Hexose + C13H17O3                                                                                                                                                                     | C19H28O9   | Miscellaneous                    | 399.1676 | 1.60E+07 |
| 107 | 5.63 | 1,3-Dicaffeoylquinic acid                                                                                                                                                             | C25H24O12  | Phenylpropanoids                 | 515.1203 | 9.96E+08 |
| 108 | 5.69 | Kaempferol-3-O-glucoside                                                                                                                                                              | C21H20O11  | Flavonoids                       | 447.0935 | 4.96E+08 |
| 109 | 5.72 | Isoliquiritin                                                                                                                                                                         | C21H22O9   | Chalcones                        | 417.1203 | 2.24E+07 |



|     |      |                                                                                                                                                                                            |           |                  |          |          |
|-----|------|--------------------------------------------------------------------------------------------------------------------------------------------------------------------------------------------|-----------|------------------|----------|----------|
| 110 | 5.80 | [(1aS,1bS,2S,5aR,6S,6aS)-1a-(hydroxymethyl)-2-[(2S,3R,4S,5S,6R)-3,4,5-trihydroxy-6-(hydroxymethyl)oxan-2-yl]oxy-2,5a,6,6a-tetrahydro-1bH-oxireno[5,6]cyclopenta[1,3-c]pyran-6-yl] benzoate | C22H26O11 | Miscellaneous    | 465.1404 | 6.11E+07 |
| 111 | 5.83 | (2S,3R,4S)-4-(2-[[[(2E)-3-(3,4-Dihydroxyphenyl)-2-propenoyl]oxy}ethyl)-2-(beta-D-glucopyranosyloxy)-3-vinyl-3,4-dihydro-2H-pyran-5-carboxylic acid                                         | C25H30O13 | Phenylpropanoids | 537.1613 | 1.31E+07 |
| 112 | 5.85 | Rhamnetin                                                                                                                                                                                  | C16H12O7  | Flavonoids       | 315.0513 | 1.38E+09 |
| 113 | 5.88 | Apigenin-7-O-glucoside                                                                                                                                                                     | C21H20O10 | Flavonoids       | 431.0997 | 4.58E+07 |
| 114 | 5.95 | Dihydrokaempferol                                                                                                                                                                          | C15H12O6  | Flavonoids       | 287.0566 | 2.12E+07 |
| 115 | 6.03 | 4-Hydroxybenzoic acid                                                                                                                                                                      | C7H6O3    | Phenols          | 137.0246 | 2.87E+07 |
| 116 | 6.04 | Naringin                                                                                                                                                                                   | C27H32O14 | Flavonoids       | 579.1729 | 1.81E+07 |
| 117 | 6.06 | Azelaic acid                                                                                                                                                                               | C9H16O4   | Fatty Acyls      | 187.0977 | 1.72E+08 |
| 118 | 6.08 | Danshensu                                                                                                                                                                                  | C9H10O5   | Phenylpropanoids | 197.0453 | 2.33E+07 |
| 119 | 6.08 | Umbelliferone                                                                                                                                                                              | C9H6O3    | Phenylpropanoids | 161.0244 | 1.09E+08 |
| 120 | 6.08 | Rosmarinic acid                                                                                                                                                                            | C18H16O8  | Phenylpropanoids | 359.0781 | 2.86E+09 |
| 121 | 6.11 | 7-hydroxy-2-(4-hydroxyphenyl)-5-[(2S,3R,4S,5S,6R)-3,4,5-trihydroxy-6-(hydroxymethyl)oxan-2-yl]oxy-2,3-dihydrochromen-4-one                                                                 | C21H22O10 | Flavonoids       | 433.1144 | 2.32E+07 |
| 122 | 6.19 | columbianetin                                                                                                                                                                              | C14H14O4  | Phenylpropanoids | 245.0818 | 4.80E+07 |
| 123 | 6.19 | Eurycomanone                                                                                                                                                                               | C20H24O9  | Terpenoids       | 407.1356 | 1.81E+08 |
| 124 | 6.23 | Phloridzin                                                                                                                                                                                 | C21H24O10 | Flavonoids       | 435.1302 | 6.03E+07 |
| 125 | 6.26 | Genistin                                                                                                                                                                                   | C21H20O10 | Flavonoids       | 431.0996 | 7.44E+07 |
| 126 | 6.34 | Homoplantagin                                                                                                                                                                              | C22H22O11 | Flavonoids       | 461.1093 | 2.77E+08 |
| 127 | 6.38 | Daidzein                                                                                                                                                                                   | C15H10O4  | Flavonoids       | 253.0502 | 3.10E+07 |
| 128 | 6.45 | Specneuzhenide                                                                                                                                                                             | C31H42O17 | Terpenoids       | 685.2384 | 1.73E+08 |

|     |      |                                                                                                                                                                                                                                                                       |           |                               |           |          |
|-----|------|-----------------------------------------------------------------------------------------------------------------------------------------------------------------------------------------------------------------------------------------------------------------------|-----------|-------------------------------|-----------|----------|
| 129 | 6.46 | 5,7-dihydroxy-2-(4-hydroxyphenyl)-6-[(2S,3R,4R,5S,6R)-3,4,5-trihydroxy-6-(hydroxymethyl)oxan-2-yl]-8-[(2S,3R,4R,5R,6S)-3,4,5-trihydroxy-6-methyloxan-2-yl]chromen-4-one                                                                                               | C27H30O14 | Flavonoids                    | 577.1591  | 5.14E+08 |
| 130 | 6.53 | Cinnamic acid                                                                                                                                                                                                                                                         | C9H8O2    | Phenylpropanoids              | 193.0512  | 1.98E+07 |
| 131 | 6.56 | Petunidin-3-O-beta-glucopyranoside                                                                                                                                                                                                                                    | C22H23O12 | Flavonoids                    | 477.1040  | 1.55E+08 |
| 132 | 6.56 | rhodioloside                                                                                                                                                                                                                                                          | C14H20O7  | Phenols                       | 299.1140  | 1.36E+07 |
| 133 | 6.61 | Flavonol base + 3O, O-Hex                                                                                                                                                                                                                                             | C21H20O11 | Flavonoids                    | 447.0936  | 6.40E+07 |
| 134 | 6.65 | Kaempferol-3-O-glucoside-7-O-rhamnoside                                                                                                                                                                                                                               | C27H30O15 | Flavonoids                    | 593.1522  | 1.77E+07 |
| 135 | 6.68 | (+)-Usniacin                                                                                                                                                                                                                                                          | C18H16O7  | Organic acids and derivatives | 343.0828  | 1.08E+08 |
| 136 | 6.75 | Scutellarein                                                                                                                                                                                                                                                          | C15H10O6  | Flavonoids                    | 285.0411  | 2.98E+07 |
| 137 | 6.80 | Kaempferol 3-O-arabinoside                                                                                                                                                                                                                                            | C20H18O10 | Flavonoids                    | 417.0839  | 2.79E+07 |
| 138 | 6.88 | Atractyloside A                                                                                                                                                                                                                                                       | C21H36O10 | Terpenoids                    | 493.2306  | 3.41E+07 |
| 139 | 6.93 | Abscisic acid                                                                                                                                                                                                                                                         | C15H20O4  | Sesquiterpenoids              | 263.1292  | 8.70E+07 |
| 140 | 6.94 | Quercetin                                                                                                                                                                                                                                                             | C15H10O7  | Flavonoids                    | 301.0362  | 1.73E+08 |
| 141 | 7.04 | Sebacic acid                                                                                                                                                                                                                                                          | C10H18O4  | Fatty Acyls                   | 201.1136  | 2.86E+07 |
| 142 | 7.15 | Wedelolactone                                                                                                                                                                                                                                                         | C16H10O7  | Phenylpropanoids              | 313.0355  | 2.04E+09 |
| 143 | 7.22 | Tectoridin                                                                                                                                                                                                                                                            | C22H22O11 | Flavonoids                    | 461.1094  | 7.80E+08 |
| 144 | 7.40 | Pelargonidin-3-O-glucoside                                                                                                                                                                                                                                            | C21H21O10 | Flavonoids                    | 431.0996  | 3.19E+08 |
| 145 | 7.45 | Chrysophanol 8-O-beta-D-glucoside                                                                                                                                                                                                                                     | C21H20O9  | Flavonoids                    | 415.1039  | 3.68E+05 |
| 146 | 7.51 | Morin                                                                                                                                                                                                                                                                 | C15H10O7  | Flavonoids                    | 301.0362  | 8.66E+07 |
| 147 | 7.54 | naringenin-7-O-glucoside                                                                                                                                                                                                                                              | C21H22O10 | Flavonoids                    | 433.1143  | 2.83E+08 |
| 148 | 7.58 | methyl (5Z)-5-ethylidene-4-[2-[[[(2R,3S,4S,5R,6R)-5-[2-[(3Z)-3-ethylidene-5-methoxycarbonyl-2-[(2S,3R,4S,5S,6R)-3,4,5-trihydroxy-6-(hydroxymethyl)oxan-2-yl]oxy-4H-pyran-4-yl]acetyl]oxy-3,4-dihydroxy-6-[2-(4-hydroxyphenyl)ethoxy]oxan-2-yl]methoxy]-2-oxoethyl]-6- | C48H64O27 | Miscellaneous                 | 1071.3605 | 1.67E+07 |

|     |      |                                                                                                                    |           |                               |          |          |
|-----|------|--------------------------------------------------------------------------------------------------------------------|-----------|-------------------------------|----------|----------|
|     |      | [(2S,3R,4S,5S,6R)-3,4,5-trihydroxy-6-(hydroxymethyl)oxan-2-yl]oxy-4H-pyran-3-carboxylate                           |           |                               |          |          |
| 149 | 7.70 | Biochanin-7-O-glucoside                                                                                            | C22H22O10 | Flavonoids                    | 491.1208 | 9.91E+08 |
| 150 | 7.72 | 5,7-dihydroxy-6-methoxy-2-[4-[(2S,3R,4S,5S,6R)-3,4,5-trihydroxy-6-(hydroxymethyl)oxan-2-yl]oxyphenyl]chromen-4-one | C22H22O11 | Flavonoids                    | 461.1095 | 1.93E+07 |
| 151 | 7.75 | Naringenin                                                                                                         | C15H12O5  | Flavonoids                    | 271.0618 | 7.81E+07 |
| 152 | 7.78 | isosakuranetin-7-O-neohesperidoside                                                                                | C28H34O14 | Flavonoids                    | 593.1896 | 1.18E+07 |
| 153 | 7.81 | Complanatuside                                                                                                     | C28H32O16 | Flavonoids                    | 623.1631 | 7.58E+06 |
| 154 | 7.91 | Nodakenin                                                                                                          | C20H24O9  | Coumarins and derivatives     | 407.1355 | 1.86E+07 |
| 155 | 7.94 | Herbacetin                                                                                                         | C15H10O7  | Flavonoids                    | 301.0362 | 8.23E+06 |
| 156 | 8.02 | Jasmonic acid                                                                                                      | C12H18O3  | Fatty acids                   | 209.1185 | 3.80E+07 |
| 157 | 8.09 | Flavone base + 3O, 1MeO                                                                                            | C16H12O6  | Flavonoids                    | 299.0569 | 3.87E+07 |
| 158 | 8.11 | Usnic acid                                                                                                         | C18H16O7  | Phenols                       | 343.0827 | 1.48E+07 |
| 159 | 8.14 | Isorhamnetin                                                                                                       | C16H12O7  | Flavonoids                    | 315.0514 | 3.67E+07 |
| 160 | 8.18 | Salvianolic acid C                                                                                                 | C26H20O10 | Phenylpropanoids              | 491.1002 | 1.88E+07 |
| 161 | 8.26 | Iridin                                                                                                             | C24H26O13 | Flavonoids                    | 521.1317 | 8.88E+06 |
| 162 | 8.29 | trifolirhizin                                                                                                      | C22H22O10 | Isoflavonoids                 | 445.1141 | 1.31E+07 |
| 163 | 8.43 | Ginsenoside Rh2 (S-FORM)                                                                                           | C36H62O8  | Terpenoids                    | 667.4450 | 1.53E+07 |
| 164 | 8.47 | Aurantio-obtusin beta-D-glucoside                                                                                  | C23H24O12 | Flavonoids                    | 491.1206 | 1.52E+07 |
| 165 | 8.49 | Baicalein                                                                                                          | C15H10O5  | Flavonoids                    | 269.0459 | 1.59E+07 |
| 166 | 8.66 | Methylophiopogonanone A                                                                                            | C19H18O6  | Flavonoids                    | 341.1039 | 1.36E+07 |
| 167 | 8.78 | FA 18:1+3O                                                                                                         | C18H34O5  | Miscellaneous                 | 329.2339 | 1.64E+09 |
| 168 | 8.80 | Cianidanol                                                                                                         | C15H14O6  | Phenols                       | 289.0725 | 8.67E+08 |
| 169 | 8.98 | Glycitein                                                                                                          | C16H12O5  | Flavonoids                    | 283.0617 | 5.99E+07 |
| 170 | 8.98 | Diethyl-phthalate                                                                                                  | C12H14O4  | Benzoic acids and derivatives | 221.0821 | 6.53E+06 |
| 171 | 8.98 | cirsimarín                                                                                                         | C23H24O11 | Flavonoids                    | 475.1260 | 6.61E+07 |

|     |       |                                                                                                                                                                                                                                                                   |           |                  |          |          |
|-----|-------|-------------------------------------------------------------------------------------------------------------------------------------------------------------------------------------------------------------------------------------------------------------------|-----------|------------------|----------|----------|
| 172 | 9.03  | Amentoflavone                                                                                                                                                                                                                                                     | C30H18O10 | Flavonoids       | 537.0814 | 5.25E+06 |
| 173 | 9.07  | Goniothalenol                                                                                                                                                                                                                                                     | C13H12O4  | Lignans          | 231.0666 | 9.33E+06 |
| 174 | 9.09  | Eupafolin                                                                                                                                                                                                                                                         | C16H12O7  | Flavonoids       | 315.0513 | 5.21E+08 |
| 175 | 9.13  | Emodin                                                                                                                                                                                                                                                            | C15H10O5  | Quinones         | 269.0460 | 7.43E+06 |
| 176 | 9.21  | Brazilein                                                                                                                                                                                                                                                         | C16H12O5  | Miscellaneous    | 283.0617 | 8.70E+06 |
| 177 | 9.21  | (2S,3S,4S,5R,6R)-6-[[[(3S,6aR,6bS,8aS,14bR)-4,4,6a,6b,11,11,14b-heptamethyl-8a-[(2S,3R,4S,5S,6R)-3,4,5-trihydroxy-6-(hydroxymethyl)oxan-2-yl]oxycarbonyl-1,2,3,4a,5,6,7,8,9,10,12,12a,14,14a-tetradecahdropicen-3-yl]oxy]-3,4,5-trihydroxyoxane-2-carboxylic acid | C42H66O14 | Terpenoids       | 793.4426 | 6.52E+06 |
| 178 | 9.40  | matairesinol                                                                                                                                                                                                                                                      | C20H22O6  | Phenylpropanoids | 357.1388 | 5.23E+06 |
| 179 | 9.45  | alpha-Hederin                                                                                                                                                                                                                                                     | C41H66O12 | Terpenoids       | 795.4552 | 5.49E+07 |
| 180 | 9.51  | (2S,3S)-3,5,7-trihydroxy-2-(4-hydroxyphenyl)-8-(3-methylbut-2-enyl)-2,3-dihydrochromen-4-one                                                                                                                                                                      | C20H20O6  | Flavonoids       | 355.1200 | 4.32E+05 |
| 181 | 9.61  | Inermin                                                                                                                                                                                                                                                           | C16H12O5  | Flavonoids       | 283.0617 | 9.65E+08 |
| 182 | 9.61  | Polygalaxanthone III                                                                                                                                                                                                                                              | C25H28O15 | Xanthones        | 567.1303 | 7.34E+06 |
| 183 | 9.79  | Ginsenoside compound K                                                                                                                                                                                                                                            | C36H62O8  | Terpenoids       | 667.4452 | 8.10E+06 |
| 184 | 9.83  | Pinocembrin                                                                                                                                                                                                                                                       | C15H12O4  | Flavonoids       | 255.0667 | 5.62E+07 |
| 185 | 9.91  | Echinocystic acid-3-O-glucoside                                                                                                                                                                                                                                   | C36H58O9  | Terpenoids       | 633.4045 | 9.54E+08 |
| 186 | 9.91  | Hederagenin base + O-Hex                                                                                                                                                                                                                                          | C36H58O9  | Terpenoids       | 679.4112 | 1.69E+07 |
| 187 | 10.12 | Fallacinol                                                                                                                                                                                                                                                        | C16H12O6  | Quinones         | 299.0564 | 1.18E+07 |
| 188 | 10.18 | 6-Gingerol                                                                                                                                                                                                                                                        | C17H26O4  | Phenols          | 293.1765 | 2.90E+07 |
| 189 | 10.20 | Blinin                                                                                                                                                                                                                                                            | C22H32O6  | Terpenoids       | 437.2211 | 7.04E+06 |
| 190 | 10.21 | Atractylenolide III                                                                                                                                                                                                                                               | C15H20O3  | Sesquiterpenoids | 247.1341 | 6.22E+06 |
| 191 | 10.22 | Eupatilin                                                                                                                                                                                                                                                         | C18H16O7  | Flavonoids       | 343.0828 | 7.80E+08 |
| 192 | 10.28 | Medicagenic acid                                                                                                                                                                                                                                                  | C30H46O6  | Triterpenoids    | 501.3228 | 8.59E+06 |
| 193 | 10.30 | Jaceosidin                                                                                                                                                                                                                                                        | C17H14O7  | Flavonoids       | 329.0678 | 1.33E+07 |

|     |       |                                                                                                                                                                                                                                     |           |                               |          |          |
|-----|-------|-------------------------------------------------------------------------------------------------------------------------------------------------------------------------------------------------------------------------------------|-----------|-------------------------------|----------|----------|
| 194 | 10.36 | Genistein                                                                                                                                                                                                                           | C15H10O5  | Flavonoids                    | 269.0460 | 3.22E+07 |
| 195 | 10.53 | [(2S,3R,4S,5S,6R)-3,4,5-trihydroxy-6-(hydroxymethyl)oxan-2-yl]<br>(1R,2R,4aS,6aS,6bR,10R,11R,12aR)-1,10,11-trihydroxy-1,2,6a,6b,9,9,12a-<br>heptamethyl-2,3,4,5,6,6a,7,8,8a,10,11,12,13,14b-tetradecahydronicene-4a-<br>carboxylate | C36H58O10 | Terpenoids                    | 649.3984 | 5.83E+06 |
| 196 | 10.85 | Pectolarigenin                                                                                                                                                                                                                      | C17H14O6  | Flavonoids                    | 313.0718 | 2.85E+07 |
| 197 | 10.89 | Isoimperatorin                                                                                                                                                                                                                      | C16H14O4  | Coumarins and derivatives     | 269.0826 | 9.15E+06 |
| 198 | 10.95 | [(2R)-2-[(E,2S,4R)-4,6-dimethyloct-6-en-2-yl]-6-oxo-2,3-dihydropyran-3-yl]<br>(2E,4E,6S)-8-hydroxy-6-(hydroxymethyl)-4-methylocta-2,4-dienoate                                                                                      | C25H38O6  | Miscellaneous                 | 433.2597 | 5.27E+06 |
| 199 | 10.97 | Aleuretic Acid                                                                                                                                                                                                                      | C16H32O5  | Organic acids and derivatives | 303.2178 | 1.02E+07 |
| 200 | 11.06 | Hydroxygenkwanin                                                                                                                                                                                                                    | C16H12O6  | Flavonoids                    | 299.0571 | 3.85E+07 |
| 201 | 11.09 | Momordin Ic                                                                                                                                                                                                                         | C41H64O13 | Terpenoids                    | 763.4330 | 3.78E+06 |
| 202 | 11.10 | Iristectorigenin B                                                                                                                                                                                                                  | C17H14O7  | Flavonoids                    | 329.0678 | 5.84E+07 |
| 203 | 11.14 | (1R,2R,4aS,6aS,6bR,10S,12aR,14bS)-1,8,10-trihydroxy-1,2,6a,6b,9,9,12a-<br>heptamethyl-2,3,4,5,6,6a,7,8,8a,10,11,12,13,14b-tetradecahydronicene-4a-<br>carboxylic acid                                                               | C30H48O5  | Terpenoids                    | 487.3443 | 3.17E+07 |
| 204 | 11.23 | Spiculisporic acid                                                                                                                                                                                                                  | C17H28O6  | Miscellaneous                 | 327.1826 | 1.07E+07 |
| 205 | 11.30 | 13-HOTrE                                                                                                                                                                                                                            | C18H30O3  | Organic acids and derivatives | 293.2125 | 9.00E+06 |
| 206 | 11.37 | Lauryl sulfate                                                                                                                                                                                                                      | C12H26O4S | Miscellaneous                 | 265.1484 | 8.62E+07 |
| 207 | 11.50 | DGMG 18:3                                                                                                                                                                                                                           | C33H56O14 | Miscellaneous                 | 675.3625 | 1.21E+07 |
| 208 | 11.62 | Kaempferol                                                                                                                                                                                                                          | C15H10O6  | Flavonoids                    | 285.0405 | 7.31E+07 |
| 209 | 11.76 | 18alpha-glycyrrhetic acid                                                                                                                                                                                                           | C30H46O4  | Terpenoids                    | 469.3330 | 4.55E+06 |
| 210 | 11.80 | Methyl hexadecanoate                                                                                                                                                                                                                | C17H34O2  | Fatty Acyls                   | 315.2541 | 4.75E+08 |
| 211 | 11.82 | (1S,4aR,6aS,6bR,9R,10R,11R,12aR,14bS)-1,10,11-trihydroxy-9-<br>(hydroxymethyl)-2,2,6a,6b,9,12a-hexamethyl-<br>1,3,4,5,6,6a,7,8,8a,10,11,12,13,14b-tetradecahydronicene-4a-carboxylic acid                                           | C30H48O6  | Terpenoids                    | 503.3381 | 2.52E+07 |

|     |       |                                                                                                                                                      |           |                               |          |          |
|-----|-------|------------------------------------------------------------------------------------------------------------------------------------------------------|-----------|-------------------------------|----------|----------|
| 212 | 11.89 | Magnolol                                                                                                                                             | C18H18O2  | Lignans                       | 265.1239 | 1.28E+07 |
| 213 | 11.92 | Dihydrocapsaicin                                                                                                                                     | C18H29NO3 | Alkaloids                     | 306.2077 | 7.30E+06 |
| 214 | 11.96 | Di-n-butyl phthalate                                                                                                                                 | C16H22O4  | Organic acids and derivatives | 277.1447 | 1.59E+07 |
| 215 | 12.01 | 2,4,6-trihydroxy-5-[1-(4-hydroxy-1,1,4,7-tetramethyl-1a,2,3,4a,5,6,7a,7b-octahydrocyclopropa[h]azulen-7-yl)-3-methylbutyl]benzene-1,3-dicarbaldehyde | C28H40O6  | Terpenoids                    | 453.2625 | 2.98E+07 |
| 216 | 12.15 | Asiatic acid                                                                                                                                         | C30H48O5  | Terpenoids                    | 533.3499 | 3.22E+07 |
| 217 | 12.35 | 12,13-EODE                                                                                                                                           | C18H32O3  | Fatty acids                   | 295.2283 | 2.05E+09 |
| 218 | 12.60 | FA 18:2+1O                                                                                                                                           | C18H32O3  | Miscellaneous                 | 295.2283 | 4.92E+06 |
| 219 | 12.64 | 16-Hydroxyhexadecanoic acid                                                                                                                          | C16H32O3  | Fatty Acyls                   | 271.2282 | 1.01E+07 |
| 220 | 12.87 | 9(S)-HOTrE                                                                                                                                           | C18H30O3  | Fatty acids                   | 293.2124 | 2.39E+08 |
| 221 | 12.96 | FA 18:1+1O                                                                                                                                           | C18H34O3  | Miscellaneous                 | 297.2436 | 2.89E+08 |
| 222 | 12.99 | isosakuranetin                                                                                                                                       | C16H14O5  | Flavonoids                    | 285.0776 | 1.07E+07 |
| 223 | 13.23 | 13-HODE                                                                                                                                              | C18H32O3  | Lipids                        | 295.2283 | 4.20E+07 |
| 224 | 13.30 | Linoleic acid                                                                                                                                        | C18H32O2  | Fatty Acyls                   | 279.2327 | 3.68E+07 |
| 225 | 13.30 | (5S,9R)-14-(hydroxymethyl)-5,9-dimethyltetracyclo[11.2.1.0 <sup>1</sup> ,1 <sup>0</sup> .0 <sup>4</sup> , <sup>9</sup> ]hexadecane-5-carboxylic acid | C20H32O3  | Terpenoids                    | 319.2288 | 7.18E+06 |
| 226 | 13.39 | Corosolic acid                                                                                                                                       | C30H48O4  | Terpenoids                    | 471.3479 | 1.51E+07 |
| 227 | 13.45 | 9,10-EODE                                                                                                                                            | C18H32O3  | Fatty acids                   | 295.2284 | 2.25E+08 |
| 228 | 14.00 | Palmitic Acid                                                                                                                                        | C16H32O2  | Fatty Acyls                   | 255.2329 | 4.03E+07 |
| 229 | 14.15 | 3-O-Acetyl-16alpha-hydroxytrametenolic acid                                                                                                          | C32H50O5  | Terpenoids                    | 513.3590 | 2.04E+08 |
| 230 | 14.15 | Roccellic Acid                                                                                                                                       | C17H32O4  | Miscellaneous                 | 299.2228 | 1.80E+07 |
| 231 | 14.16 | Periplogenin                                                                                                                                         | C23H34O5  | Terpenoids                    | 389.2336 | 6.33E+06 |
| 232 | 14.38 | ISOPALMITIC ACID                                                                                                                                     | C16H32O2  | Fatty acids                   | 255.2329 | 1.33E+07 |
| 233 | 14.56 | Glabrolide                                                                                                                                           | C30H44O4  | Terpenoids                    | 467.3170 | 4.69E+06 |
| 234 | 14.56 | Pristimerin                                                                                                                                          | C30H40O4  | Terpenoids                    | 463.2838 | 2.35E+08 |

|     |       |                                                                                                                                      |            |                          |          |          |
|-----|-------|--------------------------------------------------------------------------------------------------------------------------------------|------------|--------------------------|----------|----------|
| 235 | 14.61 | Protolichesterinic acid                                                                                                              | C19H32O4   | Terpenoids               | 323.2228 | 7.04E+06 |
| 236 | 14.62 | Abietic acid                                                                                                                         | C20H30O2   | Terpenoids               | 301.2174 | 1.18E+08 |
| 237 | 14.64 | (1R,2R,4S,7R,8S,12R)-7-(furan-3-yl)-1,8,12,17,17-pentamethyl-3,6,16-trioxapentacyclo[9.9.02,4.02,8.012,18]icos-13-ene-5,15,20-trione | C26H30O7   | Terpenoids               | 453.1960 | 8.57E+06 |
| 238 | 14.75 | Linolenic acid                                                                                                                       | C18H30O2   | Fatty Acyls              | 277.2179 | 5.14E+07 |
| 239 | 14.79 | LPC 16:0                                                                                                                             | C24H50NO7P | Lipids                   | 540.3301 | 7.33E+07 |
| 240 | 14.92 | Celastrol                                                                                                                            | C29H38O4   | Terpenoids               | 449.2687 | 2.31E+07 |
| 241 | 15.03 | 2',4'-Dihydroxychalcone                                                                                                              | C15H12O3   | Flavonoids               | 239.0720 | 4.81E+06 |
| 242 | 15.24 | Docosahexanoic acid                                                                                                                  | C22H32O2   | Fatty acids              | 327.2331 | 5.18E+07 |
| 243 | 15.24 | (2R,3R,4R,5R,6S)-2-[[[(2R,3S,4S,5R,6S)-6-(4-ethenylphenoxy)-3,4,5-trihydroxyoxan-2-yl]methoxy]-6-methyloxane-3,4,5-triol             | C20H28O10  | Miscellaneous            | 427.1585 | 3.69E+06 |
| 244 | 15.25 | Ecliptasaponin A                                                                                                                     | C36H58O9   | Terpenoids               | 633.4032 | 8.63E+06 |
| 245 | 15.31 | Isoxanthohumol                                                                                                                       | C21H22O5   | Flavonoids               | 353.1433 | 2.17E+07 |
| 246 | 15.32 | Palmitoleic acid                                                                                                                     | C16H30O2   | Fatty acids              | 253.2176 | 7.57E+06 |
| 247 | 15.49 | Arachidonic acid                                                                                                                     | C20H32O2   | Fatty acids              | 303.2339 | 1.81E+08 |
| 248 | 15.55 | 5-Ethoxy-10-gingerol                                                                                                                 | C23H38O4   | Phenols                  | 377.2711 | 1.71E+07 |
| 249 | 15.56 | Nicotinic acid                                                                                                                       | C6H5NO2    | Alkaloids                | 122.0251 | 1.18E+07 |
| 250 | 15.61 | Deoxycholic acid                                                                                                                     | C24H40O4   | Terpenoids               | 391.2849 | 7.48E+06 |
| 251 | 16.06 | 9-HODE                                                                                                                               | C18H32O3   | Lipids                   | 295.2283 | 2.21E+07 |
| 252 | 16.14 | Ginsenoside F1                                                                                                                       | C36H62O9   | Terpenoids               | 637.4340 | 5.33E+07 |
| 253 | 16.24 | Eicosenoic acid                                                                                                                      | C20H38O2   | Lipids                   | 309.2809 | 1.03E+08 |
| 254 | 16.31 | Alisol A 24-acetate                                                                                                                  | C32H52O6   | Terpenoids               | 577.3763 | 1.01E+07 |
| 255 | 16.45 | alternariol monomethyl ether                                                                                                         | C15H12O5   | Phenylpropanoids         | 271.0619 | 7.77E+06 |
| 256 | 16.72 | Oleic acid                                                                                                                           | C18H34O2   | Fatty acids              | 281.2493 | 2.04E+08 |
| 257 | 16.72 | Sorbitol                                                                                                                             | C6H14O6    | Organic oxygen compounds | 181.0721 | 5.52E+07 |
| 258 | 17.14 | Ginkgolic Acid C15:1                                                                                                                 | C22H34O3   | Phenolic acids           | 345.2445 | 4.26E+06 |

|     |       |                                      |          |            |          |          |
|-----|-------|--------------------------------------|----------|------------|----------|----------|
| 259 | 17.44 | Maslinic acid                        | C30H48O4 | Terpenoids | 471.3480 | 4.31E+06 |
| 260 | 17.77 | Fucoxanthin                          | C42H58O6 | Terpenoids | 657.4137 | 4.75E+06 |
| 261 | 26.44 | 3-[(Carboxycarbonyl)amino]-L-alanine | C5H8N2O5 | Alkaloids  | 174.9563 | 7.62E+08 |

---



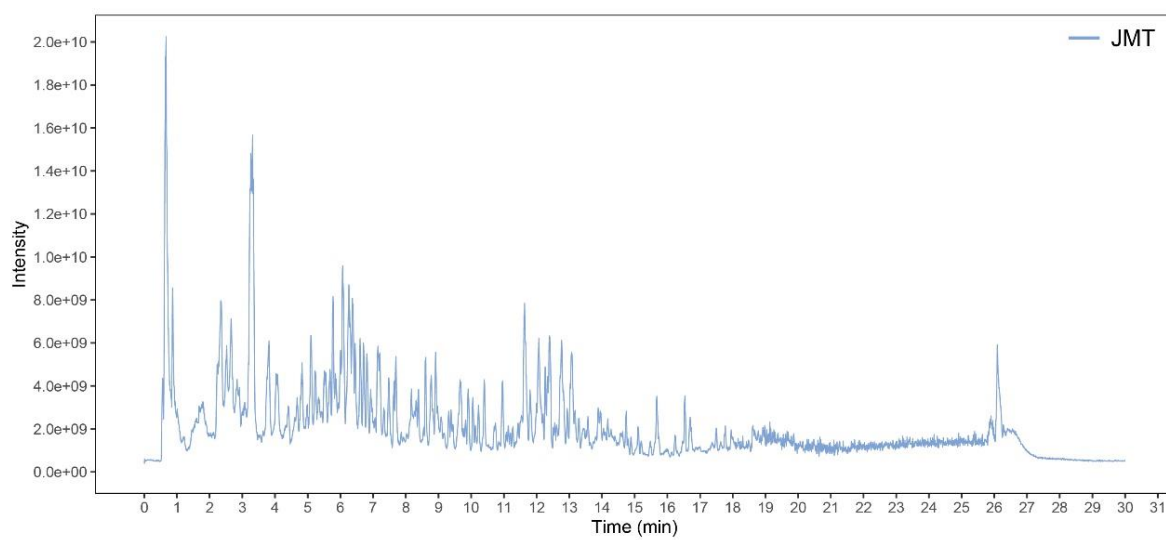

**Supplementary Figure 1. The UPLC chromatogram of JMT in negative ion mode.**

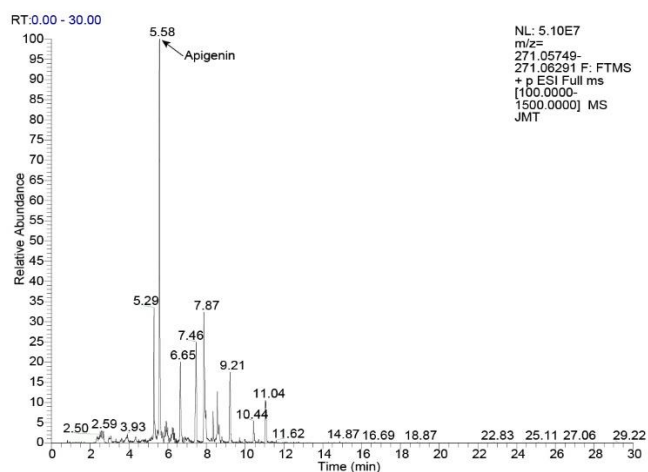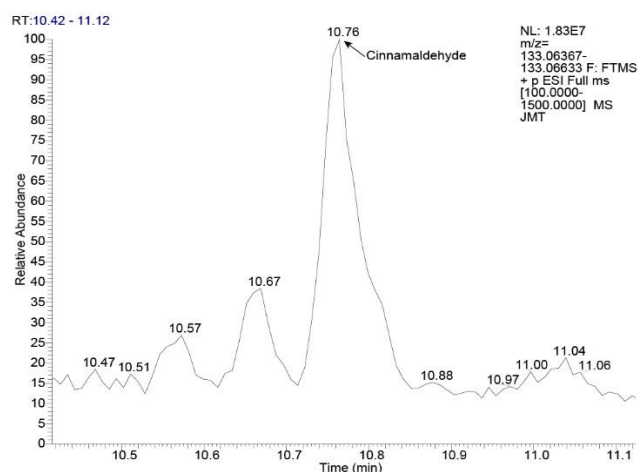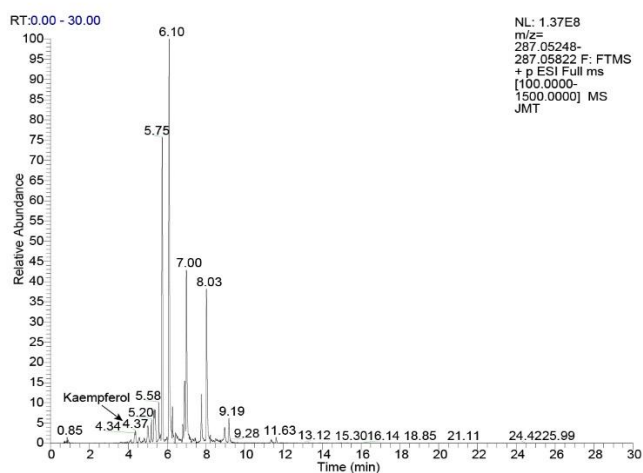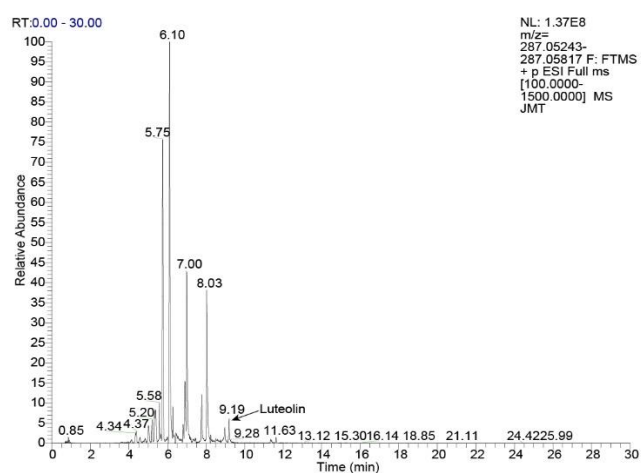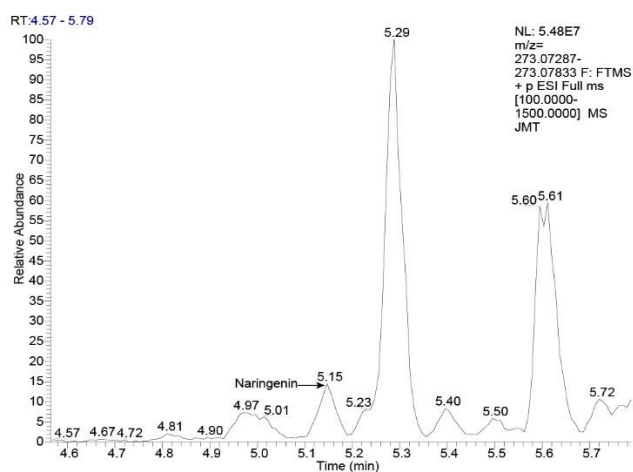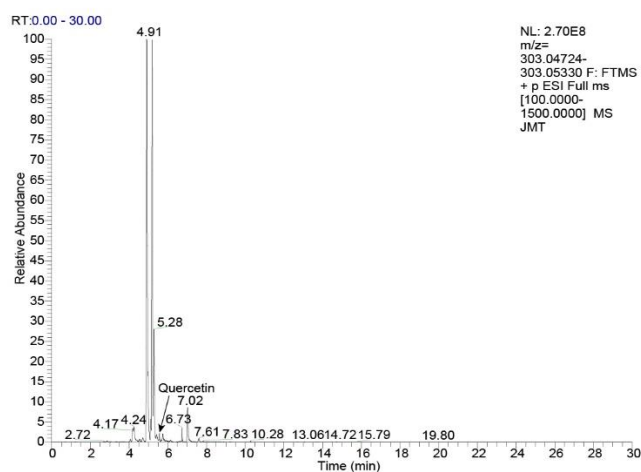

**Supplementary Figure 2. The extracted ion chromatograms of six known components in JMT.**
